# Supplementary material for: Metabolomics study reveals the potential evidence of metabolic reprogramming towards the Warburg effect in precancerous lesions
Source: PubMed Central journal article supplement (PMC7847643; doi:10.7150/jca.54252), 2021-01-10
Supplement: jcav12p1563s1.pdf [file jcav12p1563s1.pdf]

## Supplementary materials

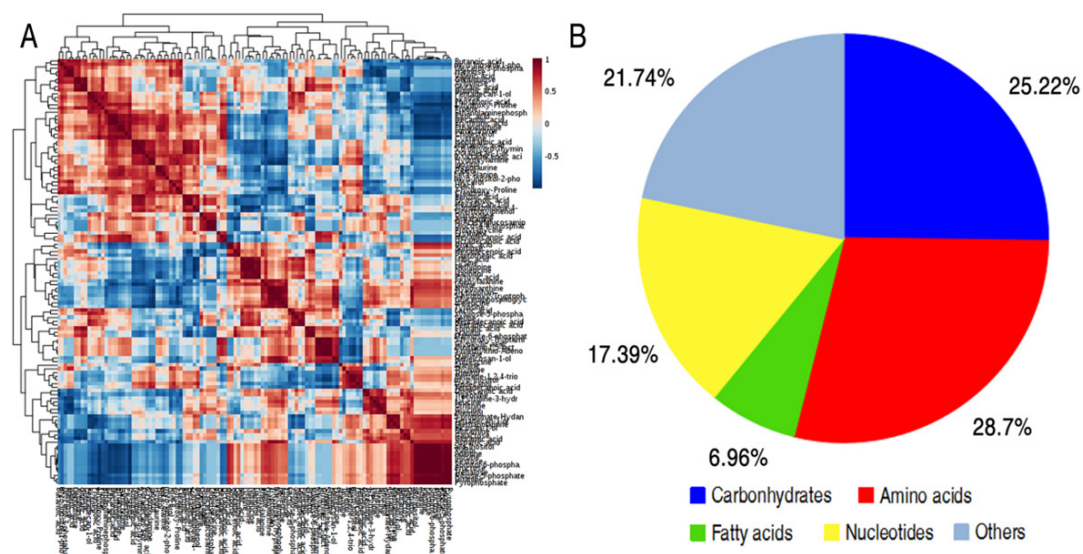

**Figure S1.** Reproducibility of the metabolomics profiling platform (A) and metabolite distribution (B). The Figure shows metabolite abundance quantified in cell samples over two technical replicates. Correlation coefficients between technical replicates varied between 0.9799 and 0.9999. This map shows the two replicates with a correlation of more than 0.9799. The identified metabolites were categorized according to KEGG (<http://www.kegg.jp/>) and NCBI PubChem (<https://pubchem.ncbi.nlm.nih.gov/>).

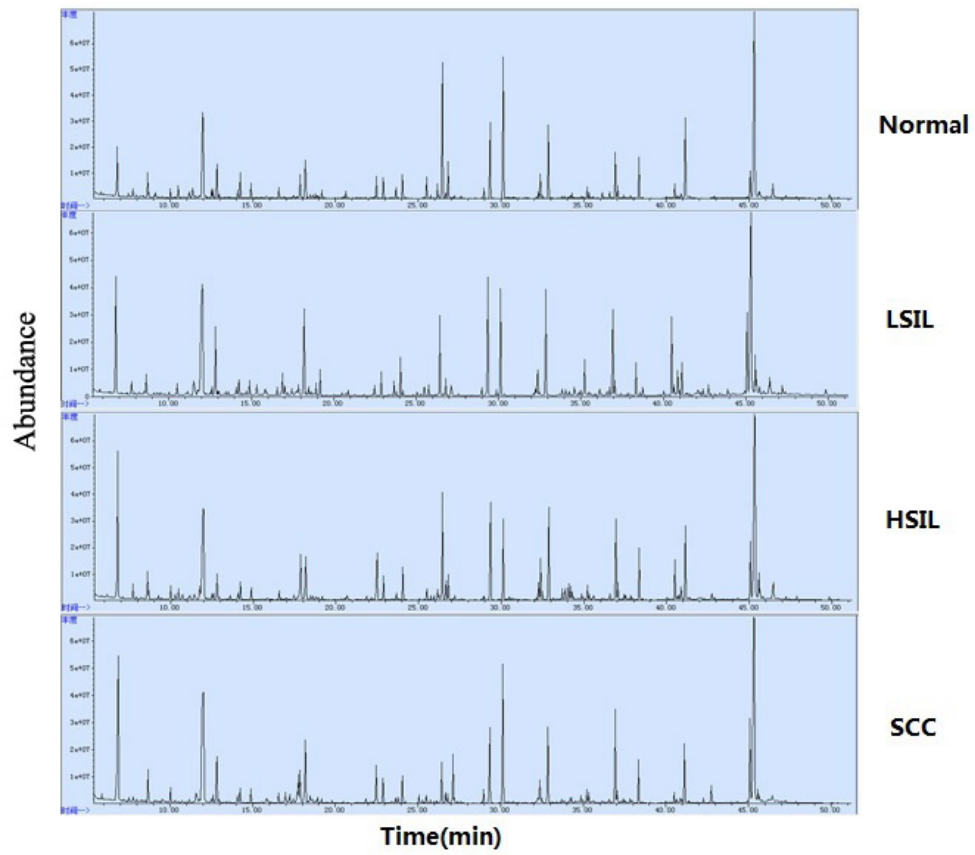

**Figure S2.** Metabolomics profiles of different cervical tissues. Representative total ion current chromatograms are shown. Normal, normal cervical epithelial tissues; LSIL, low-grade squamous intraepithelial lesions; HSIL, high-grade squamous intraepithelial lesions; and SCC, squamous cell carcinomas. X-axis, retention time (min); Y-axis, abundance.

**Table S1.** Relative abundance of metabolites in different cervical tissues determined by GC-MS.

| Metabolites  | RT (min) | Peak area (X±SD), ×10 <sup>8</sup> |            |             |            | <i>P</i><br>N vs LSIL | <i>P</i><br>N vs HSIL | <i>P</i><br>N vs SCC |
|--------------|----------|------------------------------------|------------|-------------|------------|-----------------------|-----------------------|----------------------|
|              |          | Normal                             | LSIL       | HSIL        | SCC        |                       |                       |                      |
| Lactate      | 6.851    | 8.74±5.57                          | 8.88±5.26  | 23.12±13.23 | 21.99±7.42 | 0.431                 | 0.007                 | 0.010                |
| Valine       | 7.447    | 1.29±0.26                          | 1.02±0.15  | 1.58±0.17   | 1.41±0.32  | 0.158                 | 0.148                 | 0.530                |
| Alanine      | 7.736    | 1.78±0.20                          | 2.64±0.47  | 3.05±0.98   | 3.91±0.93  | 0.148                 | 0.041                 | 0.003                |
| Phosphate    | 7.949    | 2.39±1.85                          | 2.68±1.86  | 3.27±1.16   | 5.87±1.67  | 0.819                 | 0.494                 | 0.017                |
| Leucine      | 9.017    | 0.14±0.07                          | 0.19±0.11  | 0.35±0.17   | 0.42±0.25  | 0.731                 | 0.140                 | 0.058                |
| Urea         | 11.166   | 1.86±1.32                          | 2.23±1.99  | 2.68±1.11   | 1.99±0.31  | 0.882                 | 0.434                 | 0.900                |
| Isoleucine   | 12.518   | 0.90±0.20                          | 0.84±0.04  | 0.96±0.23   | 0.86±0.05  | 0.524                 | 0.608                 | 0.705                |
| Proline      | 12.612   | 4.98±3.74                          | 0.45±0.25  | 10.57±6.44  | 0.72±0.20  | 0.079                 | 0.036                 | 0.096                |
| Glycine      | 12.843   | 3.24±1.04                          | 3.74±0.87  | 5.80±1.08   | 7.55±1.59  | 0.591                 | 0.017                 | 0.001                |
| Pyrimidine   | 13.610   | 0.16±0.09                          | 0.25±0.09  | 0.63±0.42   | 0.73±0.42  | 0.690                 | 0.069                 | 0.032                |
| Fumarate     | 14.006   | 0.12±0.00                          | 0.15±0.10  | 0.29±0.19   | 0.29±0.18  | 0.857                 | 0.316                 | 0.332                |
| Serine       | 14.248   | 1.76±0.12                          | 1.12±0.37  | 3.21±1.19   | 2.56±0.95  | 0.293                 | 0.030                 | 0.195                |
| Aspartate    | 15.865   | 0.53±0.14                          | 0.55±0.24  | 1.00±0.28   | 0.81±0.15  | 0.885                 | 0.010                 | 0.088                |
| Succinate    | 17.459   | 0.43±0.09                          | 0.69±0.41  | 1.18±0.61   | 0.88±0.35  | 0.460                 | 0.053                 | 0.213                |
| Cysteine     | 19.006   | 0.20±0.00                          | 0.08±0.03  | 0.22±0.10   | 0.15±0.01  | 0.107                 | 0.868                 | 0.433                |
| Uridine      | 23.811   | 0.66±0.17                          | 0.38±0.34  | 0.32±0.15   | 0.19±0.03  | 0.239                 | 0.153                 | 0.066                |
| Fructose     | 25.942   | 0.07±0.02                          | 0.08±0.04  | 2.86±1.57   | 2.66±1.50  | 0.996                 | 0.162                 | 0.181                |
| Tyrosine     | 26.161   | 1.60±0.20                          | 2.21±0.61  | 1.67±0.52   | 2.84±0.58  | 0.147                 | 0.861                 | 0.009                |
| Glucose      | 26.231   | 16.03±6.84                         | 9.04±1.05  | 9.05±6.28   | 4.22±1.34  | 0.671                 | 0.005                 | 0.004                |
| Galactose    | 26.314   | 0.00±0.00                          | 0.19±0.09  | 0.37±0      | 1.59±0.67  | 0.781                 | 0.585                 | 0.08                 |
| Arachidonate | 34.868   | 0.36±0.30                          | 0.33±0.10  | 1.18±0.48   | 1.62±0.50  | 0.919                 | 0.016                 | 0.001                |
| Maltose      | 40.500   | 2.50±1.12                          | 15.31±2.91 | 9.74±7.11   | 4.25±3.74  | 0.078                 | 0.661                 | 0.953                |
| Lactose      | 41.492   | 1.56±0.00                          | 1.57±0.00  | 0.61±0      | 0.59±0.00  | 0.674                 | 0.856                 | 0.843                |

HSIL, high-grade squamous intraepithelial lesions; LSIL, low-grade squamous intraepithelial lesions; Normal (N), normal cervical epithelial tissues; RT, retention time; SCC, squamous cell carcinomas; and SD, standard deviation.
